# Supplementary material for: QTL-seq identifies cooked grain elongation QTLs near soluble starch synthase and starch branching enzymes in rice (Oryza sativa L.)
Source: PubMed Central journal article supplement (PMC6554297; doi:10.1038/s41598-019-44856-2), 2019-06-06
Supplement: 41598_2019_44856_MOESM1_ESM.pdf [file 41598_2019_44856_MOESM1_ESM.pdf]

**QTL-seq identifies cooked grain elongation QTLs near *soluble starch synthase* and *starch branching enzymes* in rice (*Oryza sativa* L.)**

Siwaret Arikrit<sup>1,2</sup>, Samart Wanchana<sup>3</sup>, Srisawat Khanthong<sup>4</sup>, Chatree Saensuk<sup>2</sup>, Tripop Thianthavon<sup>4</sup>, Apichart Vanavichit<sup>1,2</sup> & Theerayut Toojinda<sup>3\*</sup>

1. Department of Agronomy, Faculty of Agriculture at Kamphaeng Saen, Kasetsart University Kamphaeng Saen Campus, Nakhon Pathom, 73140, Thailand
2. Rice Science Center, Kasetsart University Kamphaeng Saen Campus, Nakhon Pathom, 73140, Thailand
3. National Center for Genetic Engineering and Biotechnology (BIOTEC), National Science and Technology Development Agency (NSTDA), Khlong Luang, Pathum Thani 12120, Thailand
4. Faculty of Agriculture at Kamphaeng Saen, Kasetsart University Kamphaeng Saen Campus, Nakhon Pathom 73140, Thailand

\* Corresponding author at: National Center for Genetic Engineering and Biotechnology (BIOTEC), National Science and Technology Development Agency (NSTDA), Khlong Luang, Pathum Thani 12120, Thailand  
E-mail addresses: [theerayut@biotec.or.th](mailto:theerayut@biotec.or.th) (Theerayut Toojinda)

### Supplementary Fig. S1

Box plots of average raw grain length (A.) and cooked grain length (B.) among 178 F2 lines. The positions of the grain lengths in Pathum Thani1 (PTT1) and Basmati are presented with their names.

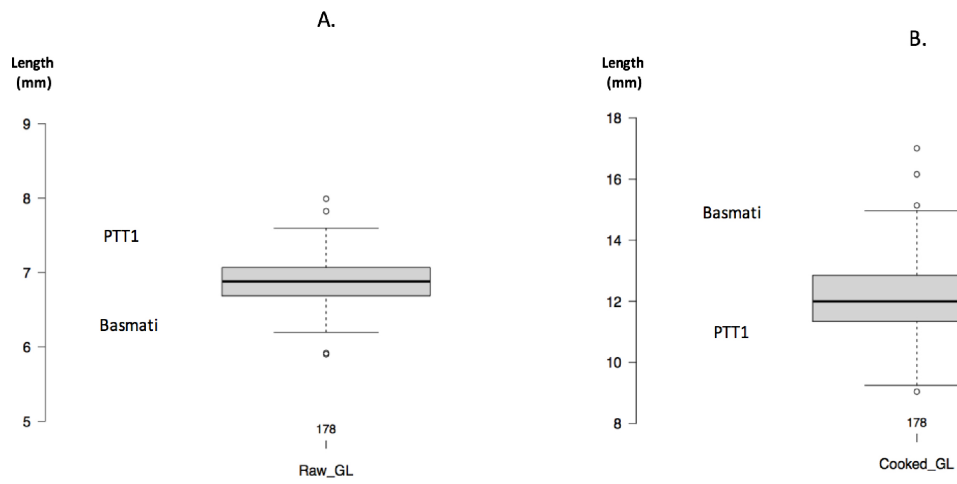

**Supplementary Table S1** Phenotypic data analyses of grain elongation ratio for 178 F<sub>2</sub> individuals.

| Trait | PTT1 | Basmati | F2 Population |      |      |          |          |
|-------|------|---------|---------------|------|------|----------|----------|
|       |      |         | Mean          | Max  | Min  | Skewness | Kurtosis |
| GE    | 1.50 | 2.26    | 1.76          | 2.37 | 1.35 | 0.46     | 3.8      |

**Supplementary Table S2** Forty selected F<sub>2</sub> lines used to generate high GE bulk and low GE bulk.

| <b>Low GE bulk</b> |                   | <b>High GE bulk</b> |                   |
|--------------------|-------------------|---------------------|-------------------|
| <b>Line number</b> | <b>Average GE</b> | <b>Line number</b>  | <b>Average GE</b> |
| 56                 | 1.46              | 37                  | 1.88              |
| 168                | 1.49              | 71                  | 1.88              |
| 100                | 1.51              | 98                  | 1.9               |
| 25                 | 1.53              | 79                  | 1.91              |
| 108                | 1.53              | 35                  | 1.93              |
| 19                 | 1.54              | 8                   | 1.93              |
| 184                | 1.55              | 52                  | 1.94              |
| 156                | 1.56              | 179                 | 1.95              |
| 40                 | 1.57              | 95                  | 1.95              |
| 6                  | 1.57              | 137                 | 1.96              |
| 120                | 1.58              | 101                 | 1.98              |
| 169                | 1.58              | 126                 | 1.99              |
| 176                | 1.58              | 148                 | 2.03              |
| 177                | 1.6               | 89                  | 2.03              |
| 83                 | 1.6               | 149                 | 2.04              |
| 196                | 1.61              | 73                  | 2.05              |
| 22                 | 1.61              | 139                 | 2.08              |
| 153                | 1.62              | 5                   | 2.1               |
| 161                | 1.63              | 130                 | 2.13              |
| 18                 | 1.64              | 118                 | 2.18              |

**Supplementary Table S3 List of predicted candidate genes in 1-Mb intervals of the qGE6.1 region.**

| <b>Chr</b> | <b>Start</b> | <b>Stop</b> | <b>Gene Name</b> | <b>Putative Function</b>                                                |
|------------|--------------|-------------|------------------|-------------------------------------------------------------------------|
| 6          | 5497369      | 5498771     | LOC_Os06g10590   | expressed protein                                                       |
| 6          | 5499342      | 5502411     | LOC_Os06g10600   | homeobox and START domains containing protein, putative, expressed      |
| 6          | 5522553      | 5523176     | LOC_Os06g10610   | expressed protein                                                       |
| 6          | 5523780      | 5528576     | LOC_Os06g10620   | transcription elongation factor SPT5 homolog 1, putative, expressed     |
| 6          | 5555007      | 5559140     | LOC_Os06g10650   | tyrosine phosphatase family protein, putative, expressed                |
| 6          | 5559909      | 5563097     | LOC_Os06g10660   | lysM domain-containing GPI-anchored protein 1 precursor, putative,      |
| 6          | 5569910      | 5571471     | LOC_Os06g10670   | aspartic proteinase nepenthesin-1 precursor, putative, expressed        |
| 6          | 5572599      | 5573850     | LOC_Os06g10680   | expressed protein                                                       |
| 6          | 5575867      | 5584373     | LOC_Os06g10690   | PHD-finger domain containing protein, putative, expressed               |
| 6          | 5586611      | 5586901     | LOC_Os06g10700   | expressed protein                                                       |
| 6          | 5588196      | 5594757     | LOC_Os06g10710   | expressed protein                                                       |
| 6          | 5597520      | 5597825     | LOC_Os06g10720   | expressed protein                                                       |
| 6          | 5601748      | 5604984     | LOC_Os06g10730   | expressed protein                                                       |
| 6          | 5613999      | 5617153     | LOC_Os06g10750   | integral membrane protein DUF6 containing protein, expressed            |
| 6          | 5619105      | 5621750     | LOC_Os06g10760   | emp24/gp25L/p24 family protein, putative, expressed                     |
| 6          | 5621926      | 5625701     | LOC_Os06g10770   | peptidase, putative, expressed                                          |
| 6          | 5629416      | 5631997     | LOC_Os06g10780   | AP2 domain containing protein, expressed                                |
| 6          | 5633354      | 5635721     | LOC_Os06g10790   | lectin-like receptor kinase, putative, expressed                        |
| 6          | 5636936      | 5637931     | LOC_Os06g10800   | zinc finger family protein, putative, expressed                         |
| 6          | 5638272      | 5641660     | LOC_Os06g10810   | phosphate carrier protein, mitochondrial precursor, putative, expressed |
| 6          | 5642245      | 5642880     | LOC_Os06g10820   | helix-loop-helix DNA-binding domain containing protein, expressed       |
| 6          | 5653538      | 5653942     | LOC_Os06g10840   | expressed protein                                                       |
| 6          | 5657850      | 5661265     | LOC_Os06g10850   | lipase, putative, expressed                                             |
| 6          | 5663968      | 5665309     | LOC_Os06g10860   | glucosyltransferase, putative, expressed                                |
| 6          | 5677080      | 5682126     | LOC_Os06g10880   | bZIP transcription factor, putative, expressed                          |
| 6          | 5688535      | 5689411     | LOC_Os06g10890   | sterol carrier protein-2, putative, expressed                           |
| 6          | 5693807      | 5694649     | LOC_Os06g10900   | DELLA protein RGL3, putative, expressed                                 |

6 5701639 5704991 LOC\_Os06g10910 xyloglucan fucosyltransferase, putative, expressed  
6 5705127 5707910 LOC\_Os06g10920 xyloglucan fucosyltransferase, putative, expressed  
6 5712154 5714660 LOC\_Os06g10930 xyloglucan fucosyltransferase, putative, expressed  
6 5717068 5717478 LOC\_Os06g10940 expressed protein  
6 5718733 5720698 LOC\_Os06g10950 xyloglucan fucosyltransferase, putative, expressed  
6 5721756 5726745 LOC\_Os06g10960 xyloglucan fucosyltransferase, putative, expressed  
6 5732121 5734237 LOC\_Os06g10970 xyloglucan fucosyltransferase, putative, expressed  
6 5734288 5736153 LOC\_Os06g10980 xyloglucan fucosyltransferase, putative, expressed  
6 5745188 5747209 LOC\_Os06g10990 DnaK family protein, putative, expressed  
6 5759685 5761518 LOC\_Os06g11010 eukaryotic aspartyl protease domain containing protein, expressed  
6 5775433 5777316 LOC\_Os06g11020 tic22-like family domain containing protein, expressed  
6 5778761 5779333 LOC\_Os06g11030 EF hand family protein, putative, expressed  
6 5784166 5788998 LOC\_Os06g11040 expressed protein  
6 5791466 5795810 LOC\_Os06g11050 cyclin-dependent kinase inhibitor, putative, expressed  
6 5800188 5800857 LOC\_Os06g11060 expressed protein  
6 5807269 5811211 LOC\_Os06g11070 expressed protein  
6 5812591 5813000 LOC\_Os06g11080 hypothetical protein  
6 5813468 5815196 LOC\_Os06g11090 CXE carboxylesterase, putative, expressed  
6 5830906 5833223 LOC\_Os06g11120 expressed protein  
6 5835562 5837122 LOC\_Os06g11130 gibberellin receptor GID1L2, putative, expressed  
6 5837564 5838523 LOC\_Os06g11135 gibberellin receptor GID1L2, putative, expressed  
6 5840075 5844550 LOC\_Os06g11140 pyridine nucleotide-disulphide oxidoreductase domain containing  
6 5847981 5849957 LOC\_Os06g11150 DUF1645 domain containing protein, putative, expressed  
6 5854313 5854669 LOC\_Os06g11160 expressed protein  
6 5857235 5861126 LOC\_Os06g11170 formin-binding protein-related, putative, expressed  
6 5862163 5869596 LOC\_Os06g11180 OsPOP12 - Putative Prolyl Oligopeptidase homologue, expressed  
6 5869895 5876421 LOC\_Os06g11190 OsPOP13 - Putative Prolyl Oligopeptidase homologue, expressed  
6 5878572 5880549 LOC\_Os06g11200 12-oxophytodienoate reductase, putative, expressed  
6 5884474 5886141 LOC\_Os06g11210 12-oxophytodienoate reductase, putative, expressed  
6 5892688 5894037 LOC\_Os06g11230 expressed protein

6 5894721 5896352 LOC\_Os06g11240 12-oxophytodienoate reductase, putative, expressed  
6 5905264 5906018 LOC\_Os06g11260 12-oxophytodienoate reductase 2, putative, expressed  
6 5908095 5909468 LOC\_Os06g11270 anthocyanidin 3-O-glucosyltransferase, putative, expressed  
6 5912374 5914368 LOC\_Os06g11280 12-oxophytodienoate reductase, putative, expressed  
6 5918106 5919690 LOC\_Os06g11290 12-oxophytodienoate reductase, putative, expressed  
6 5921695 5923664 LOC\_Os06g11300 CRR4, putative, expressed  
6 5921977 5925597 LOC\_Os06g11304 expressed protein  
6 5927194 5928879 LOC\_Os06g11308 hypothetical protein  
6 5930399 5931984 LOC\_Os06g11310 plastocyanin-like domain containing protein, putative, expressed  
6 5933788 5939645 LOC\_Os06g11320 peptidyl-prolyl cis-trans isomerase CYP40, putative, expressed  
6 5953593 5963184 LOC\_Os06g11330 OsMADS55 - MADS-box family gene with MIKc type-box, expressed  
6 5975645 5976459 LOC\_Os06g11360 expressed protein  
6 5977297 5980829 LOC\_Os06g11370 mediator of RNA polymerase II transcription subunit 6, putative,  
6 5982669 5987671 LOC\_Os06g11380 geminivirus Rep-interacting motor protein, putative, expressed  
6 6003866 6004179 LOC\_Os06g11390 expressed protein  
6 6007444 6010097 LOC\_Os06g11400 expressed protein  
6 6019597 6021861 LOC\_Os06g11410 cyclin, putative, expressed  
6 6027823 6029445 LOC\_Os06g11420 SKIP/SNW domain containing protein, expressed  
6 6032410 6035429 LOC\_Os06g11430 GRAM domain containing protein, expressed  
6 6058726 6060541 LOC\_Os06g11450 zinc finger, C3HC4 type domain containing protein, expressed  
6 6081889 6083447 LOC\_Os06g11480 hypothetical protein  
6 6086289 6097662 LOC\_Os06g11500 MCM9 - Putative minichromosome maintenance MCM family subunit 9,  
6 6086798 6088248 LOC\_Os06g11490 plastocyanin-like domain containing protein, putative, expressed  
6 6101061 6102117 LOC\_Os06g11510 expressed protein  
6 6102123 6108979 LOC\_Os06g11520 LMBR1 integral membrane protein, putative, expressed  
6 6141610 6142769 LOC\_Os06g11580 expressed protein  
6 6144586 6145404 LOC\_Os06g11590 expressed protein  
6 6146721 6150348 LOC\_Os06g11600 growth regulator related protein, putative, expressed  
6 6152018 6153438 LOC\_Os06g11610 heat shock 22 kDa protein, mitochondrial precursor, putative, expressed  
6 6155940 6159888 LOC\_Os06g11620 RNA recognition motif containing protein, putative, expressed

6 6160326 6163685 LOC\_Os06g11630 OsFBX192 - F-box domain containing protein, expressed  
6 6171585 6176329 LOC\_Os06g11640 serine/threonine-protein phosphatase 2A activator 2, putative, expressed  
6 6177853 6179163 LOC\_Os06g11650 phosphate-induced protein 1 conserved region domain containing  
protein, expressed  
6 6180308 6181639 LOC\_Os06g11660 phosphate-induced protein 1 conserved region domain containing  
protein, expressed  
6 6189101 6189358 LOC\_Os06g11670 expressed protein  
6 6191531 6192496 LOC\_Os06g11680 phosphate-induced protein 1 conserved region domain containing  
protein, expressed  
6 6199474 6200741 LOC\_Os06g11700 phosphate-induced protein 1 conserved region domain containing  
protein, expressed  
6 6202140 6202790 LOC\_Os06g11710 cytokinin-O-glucosyltransferase 2, putative, expressed  
6 6205607 6207653 LOC\_Os06g11720 cytokinin-O-glucosyltransferase 2, putative, expressed  
6 6208293 6214438 LOC\_Os06g11730 RNA recognition motif containing protein, putative, expressed  
6 6222556 6224681 LOC\_Os06g11740 OsAPRL2 adenosine 5'-phosphosulfate reductase-like OsAPRL2, expressed  
6 6227813 6229557 LOC\_Os06g11750 hypothetical protein  
6 6233100 6233579 LOC\_Os06g11760 expressed protein  
6 6237708 6238080 LOC\_Os06g11770 hypothetical protein  
6 6240043 6241172 LOC\_Os06g11780 MYB family transcription factor, putative, expressed  
6 6243660 6247719 LOC\_Os06g11790 TLD family protein, putative, expressed  
6 6250717 6253708 LOC\_Os06g11800 annexin, putative, expressed  
6 6253188 6254517 LOC\_Os06g11812 wound/stress protein, putative, expressed  
6 6255755 6256752 LOC\_Os06g11820 expressed protein  
6 6277593 6281865 LOC\_Os06g11840 trehalose phosphatase, putative, expressed  
6 6295652 6299080 LOC\_Os06g11850 expressed protein  
6 6304588 6306661 LOC\_Os06g11860 ethylene-responsive transcription factor, putative, expressed  
6 6309925 6310281 LOC\_Os06g11870 hypothetical protein  
6 6333934 6334978 LOC\_Os06g11900 expressed protein  
6 6344013 6347676 LOC\_Os06g11910 expressed protein



6 6349120 6352936 LOC\_Os06g11920 endonuclease/exonuclease/phosphatase family domain containing protein, expressed

6 6355145 6355981 LOC\_Os06g11930 SNARE domain containing protein, putative, expressed

6 6358046 6358855 LOC\_Os06g11940 dehydration-responsive element binding protein, putative, expressed

6 6369182 6370694 LOC\_Os06g11960 2,3-bisphosphoglycerate-dependent phosphoglycerate mutase, putative,

6 6372353 6376374 LOC\_Os06g11970 OsMADS63 - MADS-box family gene with MIKC\* type-box, expressed

6 6395388 6397221 LOC\_Os06g11980 DUF581 domain containing protein, expressed

6 6401419 6407785 LOC\_Os06g11990 expressed protein

6 6419602 6420378 LOC\_Os06g12000 expressed protein

6 6424294 6424808 LOC\_Os06g12010 hypothetical protein

6 6435824 6439822 LOC\_Os06g12020 membrane-anchored ubiquitin-fold protein, putative, expressed

6 6440428 6447606 LOC\_Os06g12030 glutaredoxin domain containing protein, putative, expressed

6 6452737 6454454 LOC\_Os06g12040 mTERF family protein, expressed

6 6458283 6459567 LOC\_Os06g12050 mTERF family protein, expressed

6 6461154 6465270 LOC\_Os06g12060 mTERF family protein, expressed

6 6465597 6468062 LOC\_Os06g12070 mTERF family protein, expressed

6 6472151 6473692 LOC\_Os06g12080 mTERF family protein, expressed

6 6475161 6479073 LOC\_Os06g12090 miro, putative, expressed

6 6479283 6480980 LOC\_Os06g12100 mTERF family protein, expressed

6 6482366 6485677 LOC\_Os06g12110 mTERF family protein, expressed

6 6484043 6488553 LOC\_Os06g12120 BRASSINOSTEROID INSENSITIVE 1-associated receptor kinase 1 precursor, putative, expressed

6 6489414 6491711 LOC\_Os06g12129 expressed protein

6 6492884 6494714 LOC\_Os06g12140 expressed protein

6 6495000 6497910 LOC\_Os06g12150 shikimate kinase, putative, expressed

6 6503735 6514399 LOC\_Os06g12160 AAA-type ATPase family protein, putative, expressed

6 6515548 6519199 LOC\_Os06g12170 expressed protein

6 6521987 6523338 LOC\_Os06g12180 jacalin-like lectin domain containing protein, expressed

6 6534746 6535897 LOC\_Os06g12190 glutaredoxin, putative, expressed

6 6537949 6538677 LOC\_Os06g12200 hypothetical protein

6 6556802 6557319 LOC\_Os06g12210 helix-loop-helix DNA-binding domain containing protein, expressed  
6 6559753 6563394 LOC\_Os06g12220 HVA22, putative, expressed  
6 6570778 6572727 LOC\_Os06g12230 TCP-domain protein, putative, expressed  
6 6584405 6585965 LOC\_Os06g12240 hypothetical protein  
6 6589792 6591799 LOC\_Os06g12250 sphingolipid C4-hydroxylase SUR2, putative, expressed  
6 6595940 6602476 LOC\_Os06g12260 N-rich protein, putative, expressed  
6 6603975 6604635 LOC\_Os06g12270 hypothetical protein  
6 6605479 6608454 LOC\_Os06g12280 glycosyl transferase 8 domain containing protein, putative, expressed  
6 6612661 6613440 LOC\_Os06g12290 glutathione S-transferase GSTU6, putative, expressed  
6 6643235 6643552 LOC\_Os06g12300 expressed protein  
6 6648387 6653005 LOC\_Os06g12310 aquaporin protein, putative, expressed  
6 6678245 6680864 LOC\_Os06g12320 transmembrane amino acid transporter protein, putative, expressed  
6 6682411 6685947 LOC\_Os06g12330 amino acid transporter, putative, expressed  
6 6686569 6687306 LOC\_Os06g12340 expressed protein  
6 6691061 6695070 LOC\_Os06g12350 amino acid transporter, putative, expressed  
6 6696666 6700782 LOC\_Os06g12360 pentatricopeptide, putative, expressed  
6 6701247 6704416 LOC\_Os06g12370 OsFtsH6 FtsH protease, homologue of AtFtsH6, expressed  
6 6712478 6713221 LOC\_Os06g12380 expressed protein  
6 6715886 6722017 LOC\_Os06g12390 galactosyltransferase family protein, putative, expressed  
6 6725306 6734446 LOC\_Os06g12400 Homeobox domain containing protein, expressed  
6 6736053 6737803 LOC\_Os06g12410 GDSL-like lipase/acylhydrolase, putative, expressed  
6 6741342 6741945 LOC\_Os06g12430 expressed protein  
6 6743783 6744849 LOC\_Os06g12440 LTPL60 - Protease inhibitor/seed storage/LTP family protein precursor,  
putative, expressed  
6 6748358 6753338 LOC\_Os06g12450 soluble starch synthase 2-3, chloroplast precursor, putative, expressed  
6 6754294 6755541 LOC\_Os06g12455 expressed protein  
6 6758181 6762995 LOC\_Os06g12460 CSLA3 - cellulose synthase-like family A; mannan synthase, expressed  
6 6782326 6783880 LOC\_Os06g12490 expressed protein  
6 6788986 6790050 LOC\_Os06g12500 membrane associated DUF588 domain containing protein, putative,  
6 6790516 6792069 LOC\_Os06g12510 pentatricopeptide, putative, expressed

6 6793120 6793387 LOC\_Os06g12520 hypothetical protein  
6 6794150 6796570 LOC\_Os06g12530 CS domain containing protein, putative, expressed  
6 6796598 6798469 LOC\_Os06g12539 expressed protein  
6 6801945 6802405 LOC\_Os06g12550 expressed protein  
6 6809574 6811963 LOC\_Os06g12560 zinc finger, C3HC4 type, domain containing protein, expressed  
6 6814708 6815190 LOC\_Os06g12570 expressed protein  
6 6816402 6819861 LOC\_Os06g12580 pro-resilin precursor, putative, expressed  
6 6822979 6832750 LOC\_Os06g12590 protein kinase, putative, expressed  
6 6842811 6848564 LOC\_Os06g12600 kinase, pfkB family, putative, expressed  
6 6866393 6869521 LOC\_Os06g12610 auxin efflux carrier component, putative, expressed  
6 6878753 6879729 LOC\_Os06g12620 expressed protein  
6 6892489 6895644 LOC\_Os06g12630 glutathione S-transferase, N-terminal domain containing protein,  
6 6905844 6908028 LOC\_Os06g12649 expressed protein  
6 6915783 6916582 LOC\_Os06g12660 NHL repeat-containing protein, putative, expressed  
6 6923215 6924997 LOC\_Os06g12680 RING-H2 finger protein, putative, expressed  
6 6928341 6932490 LOC\_Os06g12690 DCN1-like protein 2, putative, expressed  
6 6937045 6937368 LOC\_Os06g12700 conserved hypothetical protein  
6 6950487 6950999 LOC\_Os06g12730 expressed protein  
6 6953695 6956088 LOC\_Os06g12740 expressed protein  
6 6963552 6963960 LOC\_Os06g12760 hypothetical protein  
6 6980031 6986313 LOC\_Os06g12780 OsDegp10 - Putative Deg protease homologue, expressed  
6 6990939 6994556 LOC\_Os06g12790 ras-related protein, putative, expressed  
6 6995343 6996671 LOC\_Os06g12800 expressed protein  
6 7000436 7004404 LOC\_Os06g12810 proteins of unknown function domain containing protein, expressed  
6 7005872 7008652 LOC\_Os06g12820 proteins of unknown function domain containing protein, expressed  
6 7019819 7022061 LOC\_Os06g12830 expressed protein  
6 7025603 7027002 LOC\_Os06g12840 expressed protein  
6 7031413 7032804 LOC\_Os06g12850 expressed protein  
6 7037048 7038406 LOC\_Os06g12860 proteins of unknown function domain containing protein, putative,  
6 7043611 7045679 LOC\_Os06g12870 leaf senescence related protein, putative, expressed

6 7047258 7052772 LOC\_Os06g12876 expressed protein  
6 7053689 7056223 LOC\_Os06g12882 S phase cyclin A-associated protein in the ER, putative, expressed  
6 7059669 7060522 LOC\_Os06g12890 expressed protein  
6 7067117 7069522 LOC\_Os06g12910 XPA-binding protein 2, putative, expressed  
6 7072753 7073191 LOC\_Os06g12920 hypothetical protein  
6 7076782 7078024 LOC\_Os06g12930 expressed protein  
6 7079677 7082435 LOC\_Os06g12940 expressed protein  
6 7085090 7088528 LOC\_Os06g12950 expressed protein  
6 7093925 7096207 LOC\_Os06g12960 expressed protein  
6 7102791 7106821 LOC\_Os06g12980 cyclin, putative, expressed  
6 7118829 7120448 LOC\_Os06g12990 tRNA methyltransferase, putative, expressed  
6 7121120 7123026 LOC\_Os06g13000 ankyrin repeat domain-containing protein, chloroplast precursor,  
6 7128352 7133515 LOC\_Os06g13020 DNA polymerase lambda, putative, expressed  
6 7133789 7140003 LOC\_Os06g13030 OsLIM - LIM domain protein, putative actin-binding protein and  
transcription factor, expressed  
6 7144204 7146074 LOC\_Os06g13040 glycosyl hydrolases family 16, putative, expressed  
6 7148961 7158822 LOC\_Os06g13050 peroxidase family protein, expressed  
6 7159988 7164156 LOC\_Os06g13060 heat shock protein DnaJ, putative, expressed  
6 7169830 7172482 LOC\_Os06g13070 hhH-GPD superfamily base excision DNA repair protein, putative,  
6 7181648 7183586 LOC\_Os06g13080 spotted leaf 11, putative, expressed  
6 7186601 7188076 LOC\_Os06g13090 armadillo/beta-catenin repeat family protein, putative, expressed  
6 7188393 7191451 LOC\_Os06g13100 CREG1 precursor, putative, expressed  
6 7201591 7203994 LOC\_Os06g13120 expressed protein  
6 7205227 7205817 LOC\_Os06g13130 expressed protein  
6 7209516 7212490 LOC\_Os06g13140 WD domain, G-beta repeat domain containing protein, expressed  
6 7216473 7217001 LOC\_Os06g13150 hypothetical protein  
6 7218853 7220283 LOC\_Os06g13160 viral-response family protein, expressed  
6 7221749 7224410 LOC\_Os06g13170 expressed protein  
6 7224942 7226417 LOC\_Os06g13180 metalloendoproteinase 1 precursor, putative, expressed  
6 7230154 7230942 LOC\_Os06g13190 expressed protein

6 7231572 7235608 LOC\_Os06g13200 proton-dependent oligopeptide transport, putative, expressed  
6 7247729 7251058 LOC\_Os06g13210 peptide transporter PTR2, putative, expressed  
6 7256821 7259221 LOC\_Os06g13215 growth regulator related protein, putative, expressed  
6 7260407 7264016 LOC\_Os06g13220 expressed protein  
6 7267160 7269232 LOC\_Os06g13230 expressed protein  
6 7278365 7282975 LOC\_Os06g13240 BURP domain containing protein, expressed  
6 7293011 7296554 LOC\_Os06g13250 hypothetical protein  
6 7306306 7307547 LOC\_Os06g13280 O-methyltransferase, putative, expressed  
6 7318599 7323201 LOC\_Os06g13310 SAM dependent carboxyl methyltransferase, putative, expressed  
6 7325614 7327449 LOC\_Os06g13320 protein kinase, putative, expressed  
6 7333278 7335741 LOC\_Os06g13330 expressed protein  
6 7338076 7339727 LOC\_Os06g13340 expressed protein  
6 7341809 7344913 LOC\_Os06g13350 SAM dependent carboxyl methyltransferase, putative, expressed  
6 7367791 7368195 LOC\_Os06g13380 expressed protein  
6 7369137 7371782 LOC\_Os06g13390 SAM dependent carboxyl methyltransferase, putative, expressed  
6 7376286 7376932 LOC\_Os06g13410 OsSCP33 - Putative Serine Carboxypeptidase homologue, expressed  
6 7378698 7380890 LOC\_Os06g13420 OsSCP34 - Putative Serine Carboxypeptidase homologue, expressed  
6 7397012 7397462 LOC\_Os06g13440 expressed protein  
6 7401127 7404267 LOC\_Os06g13450 cystathionine beta-lyase, putative, expressed  
6 7406037 7408609 LOC\_Os06g13460 SAM dependent carboxyl methyltransferase family protein, putative,  
6 7417633 7422147 LOC\_Os06g13470 SAM dependent carboxyl methyltransferase, putative, expressed  
6 7423689 7424045 LOC\_Os06g13480 expressed protein  
6 7429730 7433791 LOC\_Os06g13490 SAM dependent carboxyl methyltransferase domain containing protein,  
6 7455885 7456584 LOC\_Os06g13510 SAM dependent carboxyl methyltransferase family protein, putative  
6 7459467 7461720 LOC\_Os06g13520 SAM dependent carboxyl methyltransferase domain containing protein,  
6 7468750 7469413 LOC\_Os06g13530 benzoate carboxyl methyltransferase, putative, expressed  
6 7474908 7475598 LOC\_Os06g13550 SAM dependent carboxyl methyltransferase family protein, putative,  
6 7480067 7482194 LOC\_Os06g13560 SAM dependent carboxyl methyltransferase, putative, expressed  
6 7488066 7496669 LOC\_Os06g13570 expressed protein  
6 7498331 7500517 LOC\_Os06g13580 expressed protein

6 7519619 7520480 LOC\_Os06g13590 PE-PGRS family protein, putative, expressed  
6 7530834 7534857 LOC\_Os06g13600 HEAT repeat family protein, putative, expressed  
6 7540774 7541864 LOC\_Os06g13610 expressed protein  
6 7544706 7545167 LOC\_Os06g13620 expressed protein  
6 7555463 7558367 LOC\_Os06g13640 expressed protein  
6 7564755 7571033 LOC\_Os06g13650 alpha-mannosidase 2, putative, expressed  
6 7574978 7581553 LOC\_Os06g13660 alanyl-tRNA synthetase, putative, expressed  
6 7584780 7590605 LOC\_Os06g13670 E2F family transcription factor protein, putative, expressed  
6 7591912 7593109 LOC\_Os06g13680 B12D protein, putative, expressed  
6 7595183 7595952 LOC\_Os06g13690 expressed protein  
6 7596393 7597214 LOC\_Os06g13700 hypothetical protein  
6 7600956 7601522 LOC\_Os06g13710 glycosyltransferase, putative, expressed  
6 7602364 7605812 LOC\_Os06g13720 dehydrogenase E1 component domain containing protein, expressed  
6 7607108 7607939 LOC\_Os06g13730 glutamate receptor precursor, putative, expressed  
6 7619834 7623919 LOC\_Os06g13750 expressed protein  
6 7629547 7631705 LOC\_Os06g13760 glycosyl transferase 8 domain containing protein, putative, expressed  
6 7642070 7644455 LOC\_Os06g13780 expressed protein  
6 7647852 7648414 LOC\_Os06g13800 expressed protein  
6 7648922 7653701 LOC\_Os06g13810 pyrophosphate--fructose 6-phosphate 1-phosphotransferase subunit  
beta, putative, expressed  
6 7661691 7670034 LOC\_Os06g13820 dynamin, putative, expressed

---

**Supplementary Table S4 List of predicted candidate genes in 1-Mb intervals of the qGE6.2.1 and qGE6.2.2 regions.****qGE6.2.1**

| <b>Chr</b> | <b>Start</b> | <b>Stop</b> | <b>Gene Name</b> | <b>Putative Function</b>                                      |
|------------|--------------|-------------|------------------|---------------------------------------------------------------|
| 6          | 12931779     | 12934695    | LOC_Os06g22290   | legume lectins beta domain containing protein, expressed      |
| 6          | 12962817     | 12966525    | LOC_Os06g22330   | expressed protein                                             |
| 6          | 12967302     | 12969111    | LOC_Os06g22340   | cytochrome P450, putative, expressed                          |
| 6          | 12973921     | 12978456    | LOC_Os06g22350   | expressed protein                                             |
| 6          | 12983166     | 12983888    | LOC_Os06g22360   | hypothetical protein                                          |
| 6          | 12988184     | 12990508    | LOC_Os06g22370   | expressed protein                                             |
| 6          | 12990974     | 13000940    | LOC_Os06g22380   | expressed protein                                             |
| 6          | 13003028     | 13003793    | LOC_Os06g22390   | expressed protein                                             |
| 6          | 13009938     | 13010619    | LOC_Os06g22394   | expressed protein                                             |
| 6          | 13019641     | 13021760    | LOC_Os06g22400   | expressed protein                                             |
| 6          | 13029814     | 13030182    | LOC_Os06g22410   | expressed protein                                             |
| 6          | 13031173     | 13032066    | LOC_Os06g22420   | ZOS6-04 - C2H2 zinc finger protein, expressed                 |
| 6          | 13041900     | 13044183    | LOC_Os06g22440   | SAM dependent carboxyl methyltransferase, putative, expressed |
| 6          | 13052769     | 13053171    | LOC_Os06g22450   | expressed protein                                             |
| 6          | 13055162     | 13058027    | LOC_Os06g22460   | disease resistance protein RPM1, putative, expressed          |
| 6          | 13061315     | 13062206    | LOC_Os06g22470   | hypothetical protein                                          |
| 6          | 13070021     | 13070935    | LOC_Os06g22490   | sphingolipid C4-hydroxylase SUR2, putative, expressed         |
| 6          | 13094272     | 13095005    | LOC_Os06g22530   | hypothetical protein                                          |
| 6          | 13097662     | 13098133    | LOC_Os06g22540   | expressed protein                                             |
| 6          | 13101544     | 13112981    | LOC_Os06g22550   | transducin family protein, putative, expressed                |
| 6          | 13117696     | 13120470    | LOC_Os06g22560   | formyl transferase, putative, expressed                       |
| 6          | 13143806     | 13146070    | LOC_Os06g22600   | aluminum-activated malate transporter, putative, expressed    |
| 6          | 13148277     | 13148889    | LOC_Os06g22610   | heat shock factor protein HSF8, putative, expressed           |
| 6          | 13152632     | 13154262    | LOC_Os06g22620   | hypothetical protein                                          |
| 6          | 13161181     | 13161417    | LOC_Os06g22640   | expressed protein                                             |
| 6          | 13162901     | 13171017    | LOC_Os06g22650   | VHS and GAT domain containing protein, expressed              |

6 13172164 13175101 LOC\_Os06g22654 expressed protein  
6 13177537 13181742 LOC\_Os06g22660 EMB1303, putative, expressed  
6 13182291 13189126 LOC\_Os06g22670 tesmin/TSO1-like CXC domain containing protein, expressed  
6 13193616 13194239 LOC\_Os06g22680 hypothetical protein  
6 13196296 13198641 LOC\_Os06g22690 bundle sheath defective protein 2, putative, expressed  
6 13200907 13202281 LOC\_Os06g22700 zinc finger family protein, putative, expressed  
6 13244910 13245626 LOC\_Os06g22760 OsMADS71 - MADS-box family gene with M-alpha type-box, expressed  
6 13278774 13279302 LOC\_Os06g22800 hypothetical protein  
6 13297087 13301279 LOC\_Os06g22810 TKL\_IRAK\_CrRLK1L-1.14 - The CrRLK1L-1 subfamily has homology to the CrRLK1L homolog, expressed  
6 13302546 13306574 LOC\_Os06g22820 cyclin-dependent kinase F-1, putative, expressed  
6 13316042 13318310 LOC\_Os06g22829 expressed protein  
6 13327566 13332005 LOC\_Os06g22850 microfibrillar-associated protein 1, putative, expressed  
6 13335912 13337355 LOC\_Os06g22860 expressed protein  
6 13345333 13349182 LOC\_Os06g22870 OsIAA21 - Auxin-responsive Aux/IAA gene family member, expressed  
6 13362903 13363249 LOC\_Os06g22880 DEFL8 - Defensin and Defensin-like DEFL family  
6 13375503 13390470 LOC\_Os06g22919 DEFL9 - Defensin and Defensin-like DEFL family, expressed  
6 13379395 13379731 LOC\_Os06g22925 expressed protein  
6 13391513 13393025 LOC\_Os06g22940 hypothetical protein  
6 13394969 13397303 LOC\_Os06g22950 hypothetical protein  
6 13407319 13408859 LOC\_Os06g22960 aquaporin protein, putative, expressed  
6 13411095 13414131 LOC\_Os06g22970 expressed protein  
6 13414641 13418309 LOC\_Os06g22980 CSLD5 - cellulose synthase-like family D, expressed  
6 13428642 13431616 LOC\_Os06g23010 conserved hypothetical protein  
6 13434831 13435939 LOC\_Os06g23020 expressed protein  
6 13439148 13439922 LOC\_Os06g23030 ZF-HD protein dimerisation region containing protein, expressed  
6 13440852 13442506 LOC\_Os06g23040 expressed protein  
6 13444113 13444616 LOC\_Os06g23050 expressed protein  
6 13447099 13447755 LOC\_Os06g23060 DEFL11 - Defensin and Defensin-like DEFL family  
6 13472782 13473249 LOC\_Os06g23100 expressed protein



|   |          |          |                |                                                                                  |
|---|----------|----------|----------------|----------------------------------------------------------------------------------|
| 6 | 13476487 | 13485209 | LOC_Os06g23114 | copper methylamine oxidase precursor, putative, expressed                        |
| 6 | 13498672 | 13501214 | LOC_Os06g23140 | copper methylamine oxidase precursor, putative, expressed                        |
| 6 | 13510344 | 13510755 | LOC_Os06g23150 | hypothetical protein                                                             |
| 6 | 13514667 | 13521729 | LOC_Os06g23160 | bacterial transferase hexapeptide domain containing protein, expressed           |
| 6 | 13538870 | 13540416 | LOC_Os06g23180 | expressed protein                                                                |
| 6 | 13541654 | 13544834 | LOC_Os06g23190 | receptor-like protein kinase 5 precursor, putative, expressed                    |
| 6 | 13554710 | 13555313 | LOC_Os06g23210 | ribosomal protein L30 containing protein, expressed                              |
| 6 | 13557094 | 13559144 | LOC_Os06g23220 | GRF zinc finger family protein, expressed                                        |
| 6 | 13584733 | 13591992 | LOC_Os06g23274 | zinc finger, C3HC4 type, domain containing protein, expressed                    |
| 6 | 13601951 | 13604917 | LOC_Os06g23290 | phosphatidylinositol 3- and 4-kinase family protein, putative, expressed         |
| 6 | 13610067 | 13610641 | LOC_Os06g23300 | expressed protein                                                                |
| 6 | 13616319 | 13616866 | LOC_Os06g23310 | expressed protein                                                                |
| 6 | 13622966 | 13623430 | LOC_Os06g23330 | expressed protein                                                                |
| 6 | 13630101 | 13631415 | LOC_Os06g23350 | late embryogenesis abundant protein D-34, putative, expressed                    |
| 6 | 13631703 | 13632940 | LOC_Os06g23360 | LTPL70 - Protease inhibitor/seed storage/LTP family protein precursor, expressed |
| 6 | 13635895 | 13640070 | LOC_Os06g23370 | expressed protein                                                                |
| 6 | 13647634 | 13648352 | LOC_Os06g23380 | IQ calmodulin-binding motif family protein, putative, expressed                  |
| 6 | 13649910 | 13652229 | LOC_Os06g23390 | IQ calmodulin-binding motif family protein, putative, expressed                  |
| 6 | 13669056 | 13671846 | LOC_Os06g23410 | expressed protein                                                                |
| 6 | 13674054 | 13676418 | LOC_Os06g23420 | exostosin family domain containing protein, expressed                            |
| 6 | 13677506 | 13681875 | LOC_Os06g23430 | signal recognition particle 19 kDa protein, putative, expressed                  |
| 6 | 13685422 | 13686180 | LOC_Os06g23440 | eukaryotic translation initiation factor 1A, putative, expressed                 |
| 6 | 13690553 | 13697926 | LOC_Os06g23460 | KH domain containing protein, putative, expressed                                |
| 6 | 13699712 | 13700325 | LOC_Os06g23470 | hypothetical protein                                                             |
| 6 | 13701072 | 13701446 | LOC_Os06g23480 | expressed protein                                                                |
| 6 | 13704784 | 13722973 | LOC_Os06g23504 | DTW domain containing protein, putative, expressed                               |
| 6 | 13738447 | 13739456 | LOC_Os06g23540 | expressed protein                                                                |
| 6 | 13743329 | 13745442 | LOC_Os06g23560 | anthocyanidin 5,3-O-glucosyltransferase, putative, expressed                     |
| 6 | 13750549 | 13751946 | LOC_Os06g23570 | expressed protein                                                                |
| 6 | 13755124 | 13755576 | LOC_Os06g23590 | expressed protein                                                                |

|   |          |          |                |                                                                          |
|---|----------|----------|----------------|--------------------------------------------------------------------------|
| 6 | 13762013 | 13767164 | LOC_Os06g23600 | expressed protein                                                        |
| 6 | 13775352 | 13775953 | LOC_Os06g23620 | expressed protein                                                        |
| 6 | 13786384 | 13788325 | LOC_Os06g23640 | expressed protein                                                        |
| 6 | 13804017 | 13805815 | LOC_Os06g23650 | no apical meristem protein, putative, expressed                          |
| 6 | 13835593 | 13839057 | LOC_Os06g23684 | tyrosine aminotransferase, putative, expressed                           |
| 6 | 13871663 | 13873423 | LOC_Os06g23740 | expressed protein                                                        |
| 6 | 13877622 | 13878188 | LOC_Os06g23750 | expressed protein                                                        |
| 6 | 13883250 | 13884184 | LOC_Os06g23760 | acyl-CoA oxidase, putative, expressed                                    |
| 6 | 13885410 | 13888877 | LOC_Os06g23770 | expressed protein                                                        |
| 6 | 13888924 | 13889646 | LOC_Os06g23775 | expressed protein                                                        |
| 6 | 13892471 | 13897688 | LOC_Os06g23780 | glutaryl-CoA dehydrogenase, mitochondrial precursor, putative, expressed |
| 6 | 13900584 | 13901962 | LOC_Os06g23790 | expressed protein                                                        |
| 6 | 13905082 | 13909018 | LOC_Os06g23800 | flavin-containing monooxygenase family protein, putative, expressed      |
| 6 | 13915101 | 13915751 | LOC_Os06g23810 | expressed protein                                                        |
| 6 | 13937872 | 13938395 | LOC_Os06g23850 | expressed protein                                                        |
| 6 | 13949417 | 13951281 | LOC_Os06g23870 | acyl-CoA dehydrogenase domain protein, putative, expressed               |
| 6 | 13956961 | 13959295 | LOC_Os06g23880 | hypothetical protein                                                     |

---

### qGE6.2.2

| Chr | Start    | Stop     | Gene Name      | Putative Function                                            |
|-----|----------|----------|----------------|--------------------------------------------------------------|
| 6   | 16052471 | 16056775 | LOC_Os06g28250 | expressed protein                                            |
| 6   | 16058398 | 16060555 | LOC_Os06g28260 | expressed protein                                            |
| 6   | 16070798 | 16072705 | LOC_Os06g28300 | zinc knuckle family protein, expressed                       |
| 6   | 16168793 | 16169592 | LOC_Os06g28420 | expressed protein                                            |
| 6   | 16195179 | 16195513 | LOC_Os06g28470 | expressed protein                                            |
| 6   | 16198162 | 16200384 | LOC_Os06g28480 | polygalacturonase inhibitor 1 precursor, putative, expressed |
| 6   | 16217263 | 16219073 | LOC_Os06g28520 | expressed protein                                            |
| 6   | 16224024 | 16225310 | LOC_Os06g28524 | expressed protein                                            |
| 6   | 16245674 | 16247171 | LOC_Os06g28550 | nmrA-like family domain containing protein, expressed        |
| 6   | 16251104 | 16252882 | LOC_Os06g28560 | expressed protein                                            |

6 16264254 16270836 LOC\_Os06g28590 bg55, putative, expressed  
6 16276332 16278036 LOC\_Os06g28600 expressed protein  
6 16302034 16305078 LOC\_Os06g28630 expressed protein  
6 16329395 16331464 LOC\_Os06g28670 polygalacturonase, putative, expressed  
6 16335038 16335905 LOC\_Os06g28680 expressed protein  
6 16339515 16340768 LOC\_Os06g28690 expressed protein  
6 16352388 16353257 LOC\_Os06g28720 expressed protein  
6 16353727 16354521 LOC\_Os06g28730 expressed protein  
6 16363079 16366463 LOC\_Os06g28740 expressed protein  
6 16381270 16382990 LOC\_Os06g28760 hypothetical protein  
6 16385565 16387434 LOC\_Os06g28770 expressed protein  
6 16400699 16432410 LOC\_Os06g28820 cycloartenol synthase, putative, expressed  
6 16440845 16444414 LOC\_Os06g28840 expressed protein  
6 16481194 16485465 LOC\_Os06g28890 expressed protein  
6 16502251 16503405 LOC\_Os06g28940 hypothetical protein  
6 16504514 16505369 LOC\_Os06g28950 expressed protein  
6 16506995 16507947 LOC\_Os06g28960 expressed protein  
6 16509328 16512902 LOC\_Os06g28970 bolA, putative, expressed  
6 16534747 16535159 LOC\_Os06g29010 expressed protein  
6 16579007 16583086 LOC\_Os06g29080 expressed protein  
6 16588693 16590109 LOC\_Os06g29100 expressed protein  
6 16593797 16599300 LOC\_Os06g29110 MLO domain containing protein, putative, expressed  
STE\_PAK\_Ste20\_STLK.5 - STE kinases include homologs to sterile 7, sterile 11 and  
6 16604790 16616264 LOC\_Os06g29120 sterile 20 from yeast, expressed  
6 16649544 16653296 LOC\_Os06g29180 erythronate-4-phosphate dehydrogenase domain containing protein, expressed  
6 16658542 16658778 LOC\_Os06g29190 expressed protein  
6 16676478 16683139 LOC\_Os06g29220 erythronate-4-phosphate dehydrogenase domain containing protein, expressed  
6 16687151 16687942 LOC\_Os06g29240 expressed protein  
6 16693757 16694669 LOC\_Os06g29250 expressed protein  
6 16719384 16719848 LOC\_Os06g29290 pentatricopeptide, putative, expressed

6 16732924 16745662 LOC\_Os06g29310 ulp1 protease family protein, putative, expressed  
6 16774133 16785410 LOC\_Os06g29350 myosin, putative, expressed  
6 16785962 16787113 LOC\_Os06g29360 expressed protein  
6 16791220 16793141 LOC\_Os06g29370 expressed protein  
6 16793634 16799776 LOC\_Os06g29380 phospholipid-transporting ATPase, putative, expressed  
6 16810191 16810436 LOC\_Os06g29390 expressed protein  
6 16825601 16836210 LOC\_Os06g29400 surp module family protein, putative, expressed  
6 16852004 16858873 LOC\_Os06g29430 cytidine and deoxycytidylate deaminase zinc-binding region family protein, expressed  
6 16862021 16864413 LOC\_Os06g29440 expressed protein  
6 16877329 16878690 LOC\_Os06g29450 expressed protein  
6 16879347 16881668 LOC\_Os06g29460 expressed protein  
6 16896515 16897661 LOC\_Os06g29470 peroxidase precursor, putative, expressed  
6 16910985 16916624 LOC\_Os06g29490 expressed protein  
6 16927219 16928806 LOC\_Os06g29540 expressed protein  
6 16933182 16936296 LOC\_Os06g29560 expressed protein  
6 16960716 16961852 LOC\_Os06g29590 expressed protein  
6 16983848 16984156 LOC\_Os06g29620 hypothetical protein  
6 17003628 17010230 LOC\_Os06g29650 CDP-diacylglycerol--inositol 3-phosphatidyltransferase 1, putative, expressed  
6 17020710 17021075 LOC\_Os06g29670 expressed protein  
6 17029405 17030321 LOC\_Os06g29679 expressed protein  
6 17035080 17036915 LOC\_Os06g29690 dynein light chain type 1 domain containing protein, expressed  
6 17044170 17046351 LOC\_Os06g29700 OsFBD11 - F-box and FBD domain containing protein, expressed  
6 17054545 17066625 LOC\_Os06g29710 OsFBD12 - F-box and FBD domain containing protein, expressed  
6 17066919 17068618 LOC\_Os06g29730 RALFL28 - Rapid ALkalinization Factor RALF family protein precursor, expressed  
6 17077761 17080192 LOC\_Os06g29740 OsFBX197 - F-box domain containing protein, expressed

---

**Supplementary Table S5 List of predicted candidate genes in 1-Mb intervals of the qGE4.1 region.**

| Chr | Start    | Stop     | Gene Name      | Description                                                                                                                                                   |
|-----|----------|----------|----------------|---------------------------------------------------------------------------------------------------------------------------------------------------------------|
| 4   | 19651659 | 19656024 | LOC_Os04g32620 | ethylene-responsive transcription factor ERF114, putative, expressed                                                                                          |
| 4   | 19669788 | 19670995 | LOC_Os04g32640 | hypothetical protein                                                                                                                                          |
| 4   | 19677039 | 19682186 | LOC_Os04g32650 | tRNA synthetase class II core domain containing protein, expressed<br>cytochrome b-c1 complex subunit Rieske, mitochondrial precursor,<br>putative, expressed |
| 4   | 19684934 | 19688086 | LOC_Os04g32660 | exostosin family domain containing protein, expressed                                                                                                         |
| 4   | 19690552 | 19694678 | LOC_Os04g32670 | POEI20 - Pollen Ole e I allergen and extensin family protein precursor,<br>expressed protein                                                                  |
| 4   | 19693409 | 19694678 | LOC_Os04g32680 | LEM13 - Anther-specific LEM1 family protein precursor, expressed                                                                                              |
| 4   | 19695368 | 19709974 | LOC_Os04g32690 | 40S ribosomal protein S27, putative, expressed                                                                                                                |
| 4   | 19710889 | 19711503 | LOC_Os04g32700 | hydrolase, NUDIX family, domain containing protein, expressed                                                                                                 |
| 4   | 19712823 | 19714034 | LOC_Os04g32710 | hypothetical protein                                                                                                                                          |
| 4   | 19735871 | 19740198 | LOC_Os04g32740 | AP2 domain containing protein, expressed                                                                                                                      |
| 4   | 19773223 | 19773949 | LOC_Os04g32780 | basic proline-rich protein, putative, expressed                                                                                                               |
| 4   | 19790424 | 19791835 | LOC_Os04g32790 | expressed protein                                                                                                                                             |
| 4   | 19796270 | 19798423 | LOC_Os04g32800 | expressed protein                                                                                                                                             |
| 4   | 19812328 | 19814330 | LOC_Os04g32810 | expressed protein                                                                                                                                             |
| 4   | 19819398 | 19820459 | LOC_Os04g32820 | expressed protein                                                                                                                                             |
| 4   | 19822056 | 19822949 | LOC_Os04g32830 | expressed protein                                                                                                                                             |
| 4   | 19826312 | 19827902 | LOC_Os04g32840 | formin-like protein 20, putative, expressed                                                                                                                   |
| 4   | 19835131 | 19836871 | LOC_Os04g32850 | basic proline-rich protein, putative, expressed                                                                                                               |
| 4   | 19841565 | 19844276 | LOC_Os04g32860 | expressed protein                                                                                                                                             |
| 4   | 19849118 | 19850578 | LOC_Os04g32870 | pentatricopeptide repeat-containing protein, putative, expressed                                                                                              |
| 4   | 19850971 | 19859052 | LOC_Os04g32880 | CBS domain containing membrane protein, putative, expressed                                                                                                   |
| 4   | 19886676 | 19892492 | LOC_Os04g32920 | potassium transporter, putative, expressed                                                                                                                    |
| 4   | 19893384 | 19896711 | LOC_Os04g32930 | DNA cross-link repair 1A protein, putative, expressed                                                                                                         |
| 4   | 19899895 | 19903657 | LOC_Os04g32940 | Leucine Rich Repeat family protein, expressed                                                                                                                 |
| 4   | 19913228 | 19916749 | LOC_Os04g32950 | calreticulin precursor protein, putative, expressed                                                                                                           |
| 4   | 19920789 | 19929902 | LOC_Os04g32960 | TUDOR protein with multiple SNc domains, putative, expressed                                                                                                  |

4 19933108 19937566 LOC\_Os04g32970 OTU-like cysteine protease family protein, putative, expressed  
4 19940102 19942156 LOC\_Os04g32980 protein binding protein, putative, expressed  
4 19984084 19984644 LOC\_Os04g33020 expressed protein  
4 19994476 19996281 LOC\_Os04g33030 protein binding protein, putative, expressed  
4 20006128 20009276 LOC\_Os04g33040 alpha-amylase precursor, putative, expressed  
4 20009913 20015529 LOC\_Os04g33050 HIRAN domain containing protein, putative, expressed  
4 20015750 20019634 LOC\_Os04g33060 NAD dependent epimerase/dehydratase family protein, putative,  
4 20020086 20020355 LOC\_Os04g33070 expressed protein  
4 20021233 20025228 LOC\_Os04g33080 protein phosphatase 2C, putative, expressed  
4 20038759 20039182 LOC\_Os04g33100 hypothetical protein  
4 20045882 20046918 LOC\_Os04g33110 expressed protein  
4 20047507 20048091 LOC\_Os04g33115 expressed protein  
4 20057589 20058305 LOC\_Os04g33130 expressed protein  
4 20061940 20064227 LOC\_Os04g33140 expressed protein  
4 20065193 20066677 LOC\_Os04g33150 desiccation-related protein PCC13-62 precursor, putative, expressed  
4 20067814 20068212 LOC\_Os04g33160 hypothetical protein  
4 20072917 20073300 LOC\_Os04g33170 hypothetical protein  
4 20074215 20074457 LOC\_Os04g33180 expressed protein  
4 20077759 20083076 LOC\_Os04g33190 AMP-binding enzyme, putative, expressed  
4 20083916 20086861 LOC\_Os04g33200 heparan-alpha-glucosaminide N-acetyltransferase, putative, expressed  
4 20094182 20099729 LOC\_Os04g33210 ERD1 protein, chloroplast precursor, putative, expressed  
4 20099031 20103020 LOC\_Os04g33220 SAM domain family protein, expressed  
4 20105082 20108469 LOC\_Os04g33230 hypothetical protein  
4 20109574 20110741 LOC\_Os04g33240 sex determination protein tasselseed-2, putative, expressed  
4 20114964 20115457 LOC\_Os04g33250 conserved hypothetical protein  
4 20117269 20122227 LOC\_Os04g33260 expressed protein  
4 20124675 20131224 LOC\_Os04g33280 expressed protein  
4 20134769 20135921 LOC\_Os04g33290 cysteine protease, putative, expressed  
4 20138880 20141866 LOC\_Os04g33300 amino acid kinase, putative, expressed  
4 20144021 20145529 LOC\_Os04g33310 expressed protein

4 20158993 20161450 LOC\_Os04g33320 expressed protein  
4 20169585 20171246 LOC\_Os04g33390 prephenate dehydratase domain containing protein, expressed  
4 20187930 20189402 LOC\_Os04g33330 expressed protein  
4 20190337 20190988 LOC\_Os04g33340 expressed protein  
4 20195358 20196213 LOC\_Os04g33350 expressed protein  
4 20200072 20201885 LOC\_Os04g33360 gibberellin 2-beta-dioxygenase 7, putative, expressed  
4 20211340 20213320 LOC\_Os04g33370 cytochrome P450, putative, expressed  
4 20214939 20215652 LOC\_Os04g33380 expressed protein  
4 20221253 20223074 LOC\_Os04g33450 expressed protein  
4 20224555 20226415 LOC\_Os04g33440 DNA-binding protein S1FA, putative, expressed  
4 20226884 20227249 LOC\_Os04g33430 expressed protein  
4 20229222 20230813 LOC\_Os04g33420 DNA-binding protein S1FA, putative, expressed  
4 20236216 20238126 LOC\_Os04g33400 OsFBLD2 - F-box, LRR and FBD domain containing protein, expressed  
4 20239790 20243460 LOC\_Os04g33460 1,4-alpha-glucan-branching enzyme 2, chloroplast precursor, putative,  
4 20245217 20249961 LOC\_Os04g33470 Ser/Thr protein phosphatase family protein, putative, expressed  
4 20250089 20255825 LOC\_Os04g33480 histone deacetylase, putative, expressed

---

**Supplementary Table S6** Plants with high grain elongation ratio and low grain elongation ratio.

The letters A and a represent Basmati's and PTT1's marker alleles, respectively.

| No. | SSIIa | SBEIII | SBEIIa | GE ratio |
|-----|-------|--------|--------|----------|
| 118 | Aa    | AA     | Aa     | 2.37     |
| 5   | Aa    | Aa     | aa     | 2.30     |
| 89  | Aa    | Aa     | Aa     | 2.29     |
| 95  | AA    | Aa     | AA     | 2.29     |
| 148 | Aa    | AA     | AA     | 2.24     |
| 73  | AA    | Aa     | Aa     | 2.15     |
| 101 | Aa    | Aa     | aa     | 2.11     |
| 179 | AA    | Aa     | aa     | 2.08     |
| 71  | Aa    | Aa     | aa     | 2.06     |
| 35  | AA    | Aa     | Aa     | 2.04     |
| 126 | AA    | Aa     | AA     | 2.04     |
| 149 | Aa    | Aa     | Aa     | 2.01     |
| 137 | AA    | AA     | Aa     | 2.00     |
| 130 | AA    | Aa     | Aa     | 2.00     |
| 139 | Aa    | Aa     | AA     | 1.99     |
| 52  | AA    | Aa     | Aa     | 1.98     |
| 98  | AA    | Aa     | AA     | 1.96     |
| 8   | AA    | Aa     | AA     | 1.95     |
| 79  | Aa    | Aa     | Aa     | 1.95     |
| 37  | Aa    | Aa     | aa     | 1.93     |
| 18  | Aa    | Aa     | Aa     | 1.64     |
| 196 | Aa    | Aa     | Aa     | 1.63     |
| 153 | Aa    | Aa     | Aa     | 1.63     |
| 177 | aa    | aa     | Aa     | 1.62     |
| 176 | aa    | aa     | aa     | 1.62     |
| 161 | Aa    | Aa     | Aa     | 1.62     |
| 40  | aa    | aa     | Aa     | 1.61     |
| 83  | aa    | aa     | aa     | 1.61     |
| 19  | Aa    | aa     | aa     | 1.60     |
| 168 | aa    | aa     | aa     | 1.59     |
| 120 | Aa    | aa     | aa     | 1.57     |
| 169 | aa    | aa     | Aa     | 1.56     |
| 22  | aa    | Aa     | aa     | 1.55     |
| 156 | aa    | aa     | aa     | 1.55     |
| 6   | aa    | aa     | AA     | 1.47     |
| 184 | Aa    | Aa     | aa     | 1.44     |
| 100 | Aa    | aa     | aa     | 1.39     |
| 25  | aa    | aa     | aa     | 1.39     |
| 108 | aa    | aa     | Aa     | 1.39     |
| 56  | aa    | aa     | Aa     | 1.35     |



**Supplementary Table S7** Grain elongation ratios and marker genotypes for Wx, SSI, SSIIa, SBEIII and SBEIIa among 170 F2 plants

| Sample Name | Wx | SSI | SSIIa | SBEIII | SBEIIa | Phenotype (GE ratio) |
|-------------|----|-----|-------|--------|--------|----------------------|
| 1           | B  | B   | B     | B      | A      | 1.87                 |
| 2           | H  | H   | H     | H      | H      | 1.78                 |
| 4           | H  | H   | H     | B      | A      | 1.78                 |
| 5           | H  | H   | H     | H      | A      | 2.30                 |
| 6           | A  | A   | A     | A      | B      | 1.47                 |
| 7           | B  | B   | B     | H      | H      | 1.89                 |
| 8           | B  | B   | B     | H      | B      | 1.95                 |
| 10          | B  | B   | B     | H      | H      | 1.81                 |
| 11          | H  | H   | H     | H      | H      | 1.67                 |
| 12          | B  | B   | H     | H      | A      | 1.96                 |
| 13          | H  | H   | H     | H      | B      | 1.83                 |
| 14          | H  | H   | H     | H      | H      | 1.86                 |
| 15          | B  | B   | B     | B      | H      | 1.69                 |
| 16          | H  | B   | B     | H      | A      | 1.39                 |
| 17          | B  | B   | H     | A      | B      | 1.77                 |
| 18          | H  | H   | H     | H      | H      | 1.83                 |
| 19          | H  | H   | H     | A      | A      | 1.60                 |
| 21          | H  | H   | H     | H      | A      | 1.80                 |
| 22          | A  | A   | A     | H      | A      | 1.55                 |
| 23          | H  | B   | H     | B      | B      | 1.85                 |
| 25          | H  | H   | A     | A      | A      | 1.39                 |
| 26          | H  | H   | H     | B      | B      | 1.63                 |
| 27          | A  | A   | A     | H      | H      | 1.91                 |
| 28          | H  | H   | H     | B      | H      | 1.80                 |
| 31          | H  | H   | A     | A      | H      | 1.66                 |
| 32          | A  | A   | H     | H      | A      | 1.78                 |
| 33          | H  | H   | B     | B      | H      | 1.65                 |
| 34          | A  | A   | A     | A      | B      | 1.99                 |
| 35          | B  | B   | B     | H      | H      | 2.04                 |
| 36          | H  | H   | H     | H      | A      | 1.73                 |
| 37          | H  | H   | H     | H      | A      | 1.93                 |
| 38          | H  | H   | H     | A      | A      | 1.42                 |
| 39          | H  | A   | A     | A      | A      | 1.41                 |
| 40          | B  | H   | A     | A      | H      | 1.61                 |
| 41          | H  | H   | H     | H      | H      | 1.70                 |
| 42          | B  | B   | B     | B      | H      | 1.79                 |
| 43          | A  | A   | A     | A      | A      | 1.76                 |
| 44          | H  | A   | H     | H      | H      | 1.53                 |
| 45          | H  | H   | H     | H      | A      | 1.79                 |
| 46          | B  | B   | H     | H      | H      | 1.82                 |
| 47          | A  | A   | H     | A      | H      | 1.70                 |
| 48          | A  | H   | H     | H      | B      | 1.66                 |
| 49          | A  | A   | A     | A      | A      | 1.90                 |
| 50          | H  | H   | H     | H      | H      | 1.55                 |
| 51          | H  | H   | H     | H      | H      | 1.62                 |
| 52          | H  | H   | B     | H      | H      | 1.98                 |
| 54          | H  | B   | B     | B      | H      | 1.91                 |
| 55          | H  | H   | H     | H      | A      | 1.82                 |
| 56          | A  | A   | A     | A      | H      | 1.35                 |
| 57          | H  | B   | B     | B      | A      | 1.71                 |
| 59          | B  | B   | H     | H      | H      | 1.51                 |
| 60          | A  | H   | H     | H      | H      | 1.86                 |

|     |   |   |   |   |   |      |
|-----|---|---|---|---|---|------|
| 62  | A | A | A | A | A | 2.09 |
| 63  | A | H | H | H | A | 1.78 |
| 64  | H | H | H | H | B | 1.65 |
| 65  | H | B | H | H | H | 1.63 |
| 66  | H | H | H | H | A | 1.78 |
| 67  | H | H | H | H | B | 1.88 |
| 69  | H | H | H | A | A | 1.60 |
| 70  | H | H | H | A | H | 1.70 |
| 71  | A | H | H | H | A | 2.06 |
| 73  | A | H | B | H | H | 2.15 |
| 74  | H | H | A | H | H | 1.91 |
| 75  | H | H | H | B | B | 1.87 |
| 76  | A | A | A | A | A | 1.70 |
| 78  | H | H | B | B | H | 1.88 |
| 79  | H | H | H | H | H | 1.95 |
| 80  | A | A | H | H | H | 1.66 |
| 82  | A | A | A | A | A | 1.51 |
| 83  | H | H | A | A | A | 1.61 |
| 84  | H | H | A | A | A | 1.77 |
| 85  | H | H | B | H | A | 1.83 |
| 87  | H | H | B | B | B | 1.86 |
| 88  | B | B | B | B | H | 1.78 |
| 89  | A | H | H | H | H | 2.29 |
| 90  | H | H | A | A | A | 1.61 |
| 91  | A | H | A | A | H | 1.76 |
| 92  | B | B | H | H | H | 1.83 |
| 93  | A | A | A | A | A | 1.74 |
| 94  | H | A | A | A | H | 1.50 |
| 95  | A | A | B | H | B | 2.29 |
| 96  | H | B | H | H | A | 1.63 |
| 97  | H | H | A | A | A | 1.73 |
| 98  | B | B | B | H | B | 1.96 |
| 99  | A | A | H | H | A | 1.86 |
| 100 | A | A | H | A | A | 1.39 |
| 101 | A | H | H | H | A | 2.11 |
| 102 | A | A | A | H | H | 1.72 |
| 103 | B | B | H | H | B | 1.72 |
| 104 | H | B | H | H | B | 1.66 |
| 105 | H | H | H | H | H | 1.74 |
| 106 | B | H | H | A | A | 1.72 |
| 108 | A | A | A | A | H | 1.39 |
| 110 | H | H | H | H | B | 1.74 |
| 111 | H | H | H | H | H | 1.87 |
| 113 | H | H | H | H | B | 1.82 |
| 114 | H | H | H | H | H | 1.83 |
| 115 | A | A | H | B | H | 1.72 |
| 117 | H | B | B | B | H | 1.88 |
| 118 | B | B | H | B | H | 2.37 |
| 119 | B | B | H | A | B | 1.68 |
| 120 | H | H | H | A | A | 1.57 |
| 121 | H | H | H | H | A | 1.77 |
| 122 | A | A | B | H | A | 1.68 |
| 124 | H | B | H | H | B | 1.87 |
| 125 | A | H | B | B | H | 1.65 |
| 126 | B | B | B | H | B | 2.04 |
| 127 | H | H | H | H | H | 1.62 |
| 129 | A | A | H | H | H | 1.66 |
| 130 | B | B | B | H | H | 2.00 |
| 131 | A | A | A | A | A | 1.71 |
| 132 | H | H | H | H | A | 1.82 |

|     |   |   |   |   |   |      |
|-----|---|---|---|---|---|------|
| 133 | A | H | H | B | A | 1.75 |
| 134 | A | H | H | H | B | 1.79 |
| 135 | A | A | B | H | H | 1.65 |
| 136 | B | B | B | B | A | 1.76 |
| 137 | B | B | B | B | H | 2.00 |
| 139 | H | H | H | H | B | 1.99 |
| 140 | H | H | A | A | H | 1.73 |
| 141 | H | H | H | A | H | 1.82 |
| 142 | B | B | B | H | H | 1.90 |
| 143 | H | H | H | H | H | 1.61 |
| 144 | B | H | H | H | H | 1.83 |
| 145 | H | H | A | A | B | 1.49 |
| 146 | A | A | A | A | H | 1.90 |
| 147 | B | B | B | B | H | 1.66 |
| 148 | A | H | H | B | B | 2.24 |
| 149 | H | H | H | H | H | 2.01 |
| 150 | B | B | B | B | H | 1.92 |
| 151 | H | H | H | H | H | 1.57 |
| 152 | B | B | B | B | H | 1.76 |
| 153 | B | H | H | H | H | 1.63 |
| 154 | A | A | H | H | H | 1.58 |
| 155 | A | A | A | H | A | 1.51 |
| 156 | A | A | A | A | A | 1.55 |
| 157 | H | H | H | H | H | 1.69 |
| 158 | H | A | H | H | H | 1.92 |
| 159 | H | H | B | B | H | 1.45 |
| 160 | A | B | B | B | H | 1.67 |
| 161 | A | H | H | H | H | 1.62 |
| 162 | H | H | H | A | A | 1.73 |
| 164 | H | H | H | H | H | 1.76 |
| 167 | B | B | B | B | B | 1.93 |
| 168 | A | A | A | A | A | 1.59 |
| 169 | A | A | A | A | H | 1.56 |
| 170 | A | A | A | A | H | 1.84 |
| 171 | B | B | B | B | H | 1.84 |
| 172 | H | H | H | H | A | 1.89 |
| 173 | H | H | H | H | B | 1.75 |
| 174 | A | H | A | A | H | 1.73 |
| 175 | A | H | H | H | H | 1.64 |
| 176 | H | H | A | A | A | 1.62 |
| 177 | A | A | A | A | H | 1.62 |
| 178 | H | H | H | H | A | 1.88 |
| 179 | H | H | B | H | A | 2.08 |
| 180 | B | H | H | H | H | 1.94 |
| 181 | A | A | H | H | A | 1.87 |
| 183 | H | H | H | H | H | 1.88 |
| 184 | A | H | H | H | A | 1.44 |
| 185 | A | H | H | H | A | 1.94 |
| 186 | A | H | H | H | H | 1.89 |
| 187 | B | B | H | H | A | 1.89 |
| 188 | A | A | H | H | A | 1.80 |
| 189 | B | B | B | B | A | 1.76 |
| 190 | B | B | H | H | A | 1.65 |
| 191 | A | A | H | H | H | 1.65 |
| 193 | H | H | H | H | A | 1.67 |
| 194 | H | H | B | H | B | 1.85 |
| 195 | B | H | H | H | H | 1.73 |
| 196 | H | H | H | H | H | 1.63 |

---
